# Supplementary material
Source: PubMed Central journal article supplement (PMC4770905)
Supplement: NIHMS759162-supplement-1.pdf [file NIHMS759162-supplement-1.pdf]

## Supplementary Material

### Supplementary Methods

#### Visual Machine System

The two image processing platforms selected for the analysis were National Instruments (NI): Vision Builder for Automated Inspection (VBAI) and MATLAB: Image Processing Toolbox. VBAI is an icon-based image analysis program that allows for quick algorithm development and easy implementation, while MATLAB (Matrix Laboratory) is a coding based language that is used for more adaptable image processing (NI 2005, Andres 2006). For the paw measurements, MATLAB and its Image Processing Toolbox were used as a secondary image analysis tool, to verify the measurements made by the primary VBAI inspection algorithm.

The camera used in the analysis was a Basler A622-f, with an IEEE 1394A 'Firewire' connection, a manual focus lens and a CMOS (complementary metal oxide semiconductor) image sensor. The camera was fixed 24" above the inspection environment, oriented normal to the table surface.

The system was initially calibrated in VBAI using a grid of dots, with 0.225" from center to center, to assign a dimensional relationship with the image's pixels and to adjust for the lens' fish-eye effect (NI 2005, Shah 1996). Image processing steps were required, due to print inconsistencies, to determine the approximate x-y image coordinates of the centroid of each paw print, which would be used to calculate the stride distances. The 8-bit paw image was imported into VBAI, via the CMOS sensor and the Firewire cable, and processed using the non-linear morphological functions available in the NI Vision Assistant (NI 2005, Davies 2005). A user-defined region of interest was first created around the prints in VBAI, excluding any outside pixel information. The image of the paw prints was then eroded, in 3 iterations, using a full, 7x7 structuring element, to increase the size and consistency of each print. Next, the grayscale image was verged into a binary image, converted to black (0) and

white (1), based upon a user defined intensity value between 0 and 255, to extract the paw information from any spurious background information (smudges, pencil marks, and similar noise). Once the image was converted to a binary file, it was dilated, in 2 iterations, using a full, 5x5 structuring element. The image was dilated to decrease the overall area of each print, which increased the accuracy in mapping each paw's centroid location. Next, the image was analyzed to detect distinct objects, based upon abrupt changes in pixel intensity values and connectivity between adjacent pixels. Finally, the distance measurements were calculated in VBAI based upon the x-y centroid locations and the data were logged. A paper discussing the theory and application is in preparation.

## Supplementary Figure Captions

**Supplementary Fig 1** Cranial Nerve VII. Lateral hemisphere of cerebellum located inferior to cranial nerve VII. An enlargement of a cerebellar lateral hemisphere results in direct pressure on nerves.

**Supplementary Fig 2** Male Weights. (a) Male weights were plotted over time from P23 to P42. No significant difference was found using an ANOVA with random mouse effect analysis. (b) A power analysis indicated that the sample number was too low to detect significant differences in weight, if any. A two-way ANOVA was also performed and found no significant differences in weight gain over time.

**Supplementary Fig 3** Female Weights. (a) Female weights were plotted over time from P23 to P42. No significant difference was found using an ANOVA with random mouse effect analysis. (b) A power analysis indicated that the sample number was too low to detect significant differences in weight, if any. A two-way ANOVA was also performed and found no significant differences in weight gain over time

**Supplementary Fig 4** Statistical power analysis for one-way ANOVA on mean weights of male and female mice for P23, P28, P30, P35, P37, and P42.

**Supplementary Table 1** List of all mice and mice genders used for various behavioral assays. For grouping purpose, the mice were separated into medulloblastoma-prone vehicle (MB-DMSO), medulloblastoma-prone treated with bortezomib (MB-VLCD), wild type vehicle (WT-DMSO) and wild type treated with bortezomib (WT-VLCD).

| WT-DMSO |         | WT-VLCD |         | MB-VLCD |         | MB-DMSO |         |
|---------|---------|---------|---------|---------|---------|---------|---------|
| Males   | Females | Males   | Females | Males   | Females | Males   | Females |
| 46336   | 46362   | 46328   | 46326   | 46327   | 46357   | 46339   | 46333   |
| 46338   | 46914   | 46334   | 46363   | 46330   | 44454   | 44467   | 46337   |
| 46359   | 36939   | 44474   |         | 46361   | 44455   | 44468   | 46364   |
| 44457   |         |         |         | 44458   |         | 46539   | 44456   |
| 44475   |         |         |         | 44476   |         |         | 44464   |
| 46537   |         |         |         |         |         |         | 36935   |
| 46538   |         |         |         |         |         |         | 36938   |
| P23     |         |         |         | P28     |         |         |         |
| WT-DMSO | WT-VLCD | MB-VLCD | MB-DMSO | WT-DMSO | WT-VLCD | MB-VLCD | MB-DMSO |
| 46336   | 46326   | 46327   | 46333   | 46336   | 46326   | 46327   | 46333   |
| 46338   | 46328   | 46330   | 46337   | 46338   | 46328   | 46330   | 46337   |
| 46359   | 46334   | 46357   | 46339   | 46359   | 46334   | 46357   | 46339   |
| 46362   | 46363   | 46361   | 46364   | 46362   | 46363   | 46361   | 46364   |
|         |         |         |         | 46357   |         |         | 46539   |
|         |         |         |         | 46358   |         |         |         |
| P30     |         |         |         | P35     |         |         |         |
| WT-DMSO | WT-VLCD | MB-VLCD | MB-DMSO | WT-DMSO | WT-VLCD | MB-VLCD | MB-DMSO |
| 46336   | 46326   | 46327   | 46333   | 46336   | 46326   | 46327   | 46333   |
| 46359   | 46328   | 46330   | 46337   | 46338   | 46328   | 46330   | 46337   |

|         |         |         |         |         |         |         |         |
|---------|---------|---------|---------|---------|---------|---------|---------|
| 46338   | 46334   | 46357   | 46339   | 46359   | 46334   | 46357   | 46339   |
| 46362   | 46363   | 46361   | 46364   | 46362   | 46363   | 46361   | 46364   |
| 46537   |         |         | 46539   | 46914   |         |         | 46935   |
| 46538   |         |         |         | 46939   |         |         | 46938   |
| P37     |         |         |         | P42     |         |         |         |
| WT-DMSO | WT-VLCD | MB-VLCD | MB-DMSO | WT-DMSO | WT-VLCD | MB-VLCD | MB-DMSO |
| 46336   | 46326   | 46357   | 46339   | 46336   | 46326   | 46357   | 46339   |
| 46338   | 46328   | 46361   | 46364   | 46338   | 46328   | 46361   | 46364   |
| 46359   | 46334   | 44454   | 44456   | 46359   | 46334   | 44454   | 44456   |
| 46362   | 46363   | 44455   | 44464   | 46362   | 46363   | 44455   | 44464   |
| 44457   | 44474   | 44458   | 44467   | 44457   | 44474   | 44458   | 44467   |
| 44475   |         | 44476   | 44468   | 44475   |         | 44476   | 44468   |
| 46537   |         |         | 36935   | 46914   |         |         | 36935   |
| 46358   |         |         | 36938   | 36939   |         |         | 36938   |
| 46914   |         |         |         |         |         |         |         |
| 36939   |         |         |         |         |         |         |         |

**Supplementary Table 2** The table below shows the stride length analysis results. A Student Newman-Keuls test was performed for each day in order to identify the group that differed.

| P37, p = 0.003     |                 |       |          |
|--------------------|-----------------|-------|----------|
| Groups             | Mean Difference | q     | p ≤ 0.05 |
| MB-DMSO vs WT-VLCD | -11.95          | 5.414 | Yes      |
| MB-DMSO vs WT-DMSO | -7.156          | 3.669 | Yes      |
| MB-DMSO vs MB-VLCD | -5.181          | 2.492 | No       |
| MB-VLCD vs WT-VLCD | -6.774          | 3.129 | No       |
| MB-VLCD vs WT-DMSO | -1.975          | ---   | No       |
| WT-DMSO vs WT-VLCD | -4.799          | ---   | No       |
| P42, p = 0.002     |                 |       |          |
| Groups             | Mean Difference | q     | p ≤ 0.05 |
| MB-DMSO vs WT-VLCD | -18.28          | 4.6   | p ≤ 0.01 |
| MB-DMSO vs WT-DMSO | -14.55          | 4.085 | p ≤ 0.01 |
| MB-DMSO vs MB-VLCD | -12.74          | 2.433 | No*      |
| MB-VLCD vs WT-VLCD | -5.547          | 2.395 | No       |
| MB-VLCD vs WT-DMSO | -1.809          | ---   | No       |
| WT-DMSO vs WT-VLCD | -3.738          | ---   | No       |

**Supplementary References**

E. R. Davies, *Machine Vision: Theory Algorithms Practicalities*. 3rd ed. San Francisco: Elsevier, 2005.

National Instruments, *NI Vision: NI Vision Concepts Manual*, Austin, Texas: National Instruments Corporation, 2005.

N. Andres, R. Marimuthu, Y. Eom, and B. Jang, "Development of a machine vision system for automotive part inspection," ICMIT 2005: Information Systems and Signal Processing, 2006.

S. Shah and J.K. Aggarwal, "Intrinsic parameter calibration procedure for a (High-Distortion) fish-eye lens camera with distortion model and accuracy estimation," *Pattern Recognition*, Vol. 29, No. 11, pp. 1775-1788, 28 February 1996.
