# Supplementary material
Source: PubMed Central journal article supplement (PMC4770905)

Supplementary Figure 1

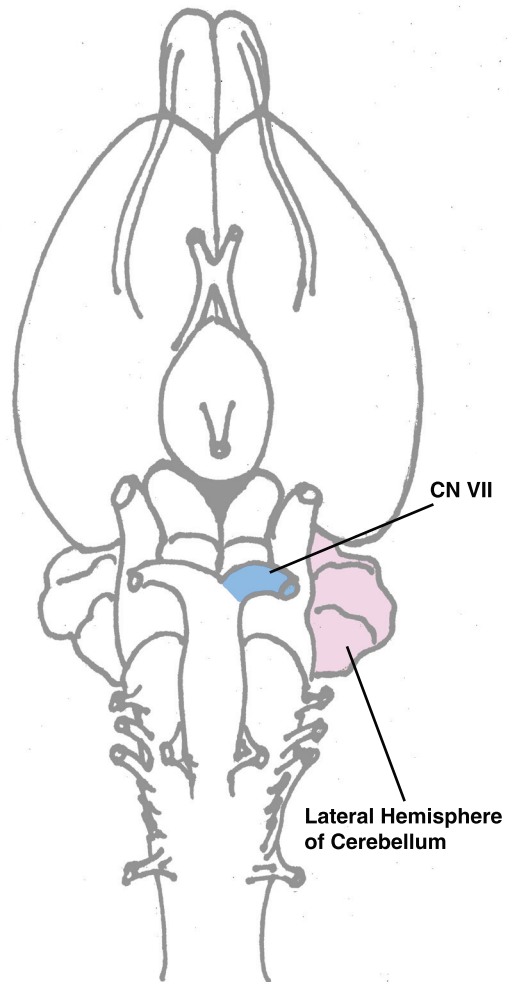

Supplement: NIHMS759162-supplement-2.pdf [file NIHMS759162-supplement-2.pdf]

Supplementary Figure 2

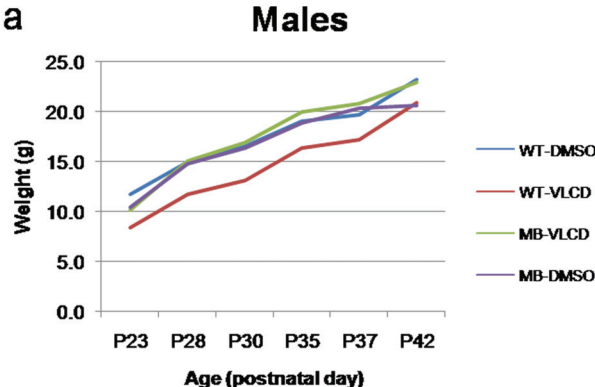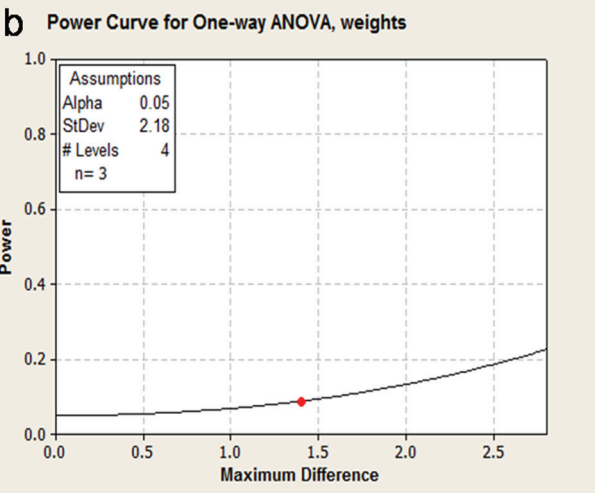

Supplement: NIHMS759162-supplement-3.pdf [file NIHMS759162-supplement-3.pdf]

Supplementary Figure 3

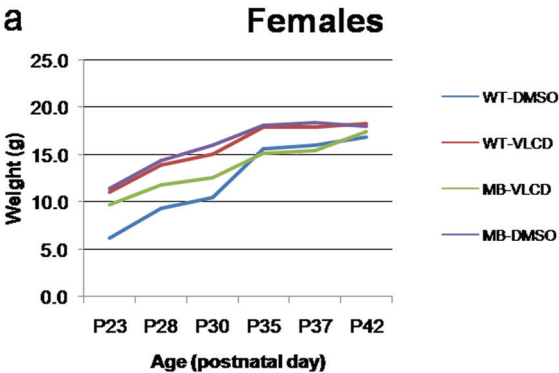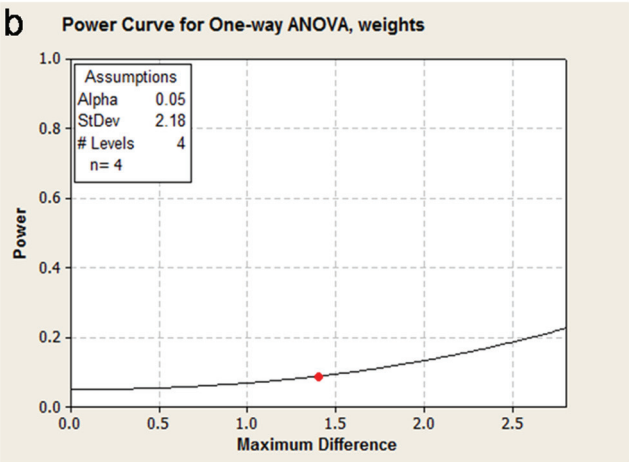

Supplement: NIHMS759162-supplement-4.pdf [file NIHMS759162-supplement-4.pdf]

## Supplementary Figure 4

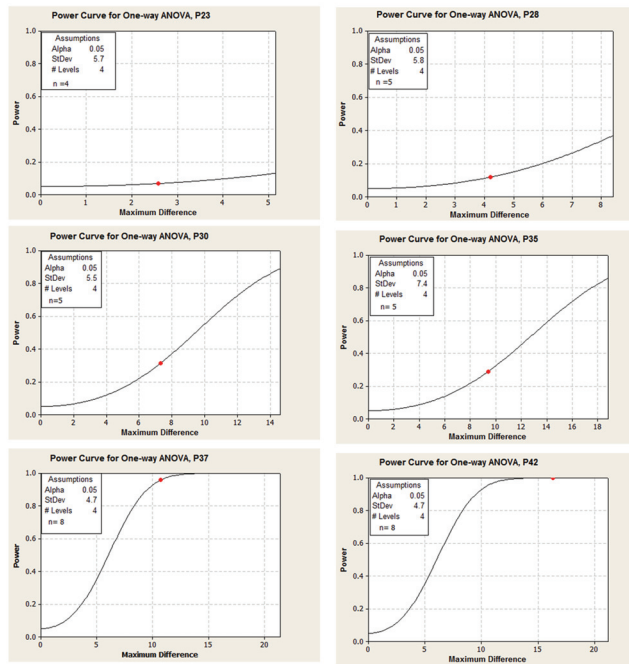

Supplement: NIHMS759162-supplement-5.pdf [file NIHMS759162-supplement-5.pdf]
